# Supplementary material
Source: PubMed Central journal article supplement (PMC7392148)
Supplement: NIHMS1601878-supplement-Final_SI__published_.pdf [file NIHMS1601878-supplement-Final_SI__published_.pdf]

# Yohimbine as a Starting Point to Access Diverse Natural Product-Like Agents with Reprogrammed Activities against Cancer-Relevant GPCR Targets

Nicholas G. Paciaroni, Verrill M. Norwood IV, Ranjala Ratnayake, Hendrik Luesch\*, Robert W. Huigens III\*

University of Florida, Department of Medicinal Chemistry, Center for Natural Product Drug Discovery and Development (CNP3), College of Pharmacy, United States

\*Corresponding authors email: [rhuigens@cop.ufl.edu](mailto:rhuigens@cop.ufl.edu), [luesch@cop.ufl.edu](mailto:luesch@cop.ufl.edu)

## Supporting Information

### Table of Contents.

|                                                                                                          |     |
|----------------------------------------------------------------------------------------------------------|-----|
| I. General Information.....                                                                              | S2  |
| II. Supplementary Figure 1. Agonistic Activity Heatmap of Yohimbine Analogues Against 168 GPCRs .....    | S3  |
| III. Supplementary Figure 2. Antagonistic Activity Heatmap of Yohimbine Analogues Against 168 GPCRs..... | S4  |
| IV. Supplementary Figure 3. <b>Y7g</b> Dose-Dependent Inhibition Against Select GPCRs.....               | S5  |
| V. Supplementary Figure 4. <b>Y1f</b> Dose-Dependent Inhibition Against Select GPCRs.....                | S8  |
| VI. Supplementary Figure 5. <b>Y6p</b> Dose-Dependent Inhibition Against Select GPCRs.....               | S11 |

## I. General Information

Solid stocks of test compounds (~5 milligrams each) were shipped for in vitro screening against GPCR drug targets and follow up dose-response experiments at DiscoverX. Each compound was dissolved in DMSO stock solutions and tested for agonist and antagonist activity profiles against each of the 168 GPCRs in the panel.

PathHunter  $\beta$ -Arrestin Assays were performed as follows: PathHunter cell lines were expanded from freezer stocks according to standard procedures. Cells were seeded in a total volume of 20  $\mu$ L into white walled, 384-well microplates and incubated at 37 °C prior to testing. For agonist determination, cells were incubated with sample to induce response. Intermediate dilution of sample stocks was performed to generate 5X sample in assay buffer. 5  $\mu$ L of 5X sample was added to cells and incubated at 37 °C or room temperature for 90 or 180 minutes. Final assay vehicle concentration was 1%. For antagonist determination, cells were pre-incubated with antagonist followed by agonist challenge at the EC<sub>80</sub> concentration. Intermediate dilution of sample stocks was performed to generate 5X sample in assay buffer. 5  $\mu$ L of 5X sample was added to cells and incubated at 37 °C or room temperature for 30 minutes. Vehicle concentration was 1%. 5  $\mu$ L of 6X EC<sub>80</sub> agonist in assay buffer was added to the cells and incubated at 37 °C or room temperature for 90 or 180 minutes. Assay signal was generated through a single addition of 12.5 or 15  $\mu$ L (50% v/v) of PathHunter Detection reagent cocktail, followed by a one hour incubation at room temperature. Microplates were read following signal generation with a PerkinElmer Envision™ instrument for chemiluminescent signal detection. Compound activity was analyzed using CBIS data analysis suite (ChemInnovation, CA). For agonist mode assays, percentage activity was calculated using the following formula: % Activity = 100% x (mean RLU of test sample - mean RLU of vehicle control) / (mean MAX control ligand - mean RLU of vehicle control). For antagonist mode assays, percentage inhibition was calculated using the following formula: % Inhibition = 100% x (1 - (mean RLU of test sample - mean RLU of vehicle control) / (mean RLU of EC80 control - mean RLU of vehicle control)). Note: This protocol is from DiscoverX. Dose-response experiments (antagonists) were carried out in assays analogous to the initial screen against GPCRs. Dose-response curves for all IC<sub>50</sub> values obtained during these studies can be found on later pages in this supporting information, including yohimbine-derived test compounds and known modulators (agonists and antagonists).

## II. Supplementary Figure 1. Agonistic Activity Heatmap of Yohimbine Analogues against 168 GPCRs.

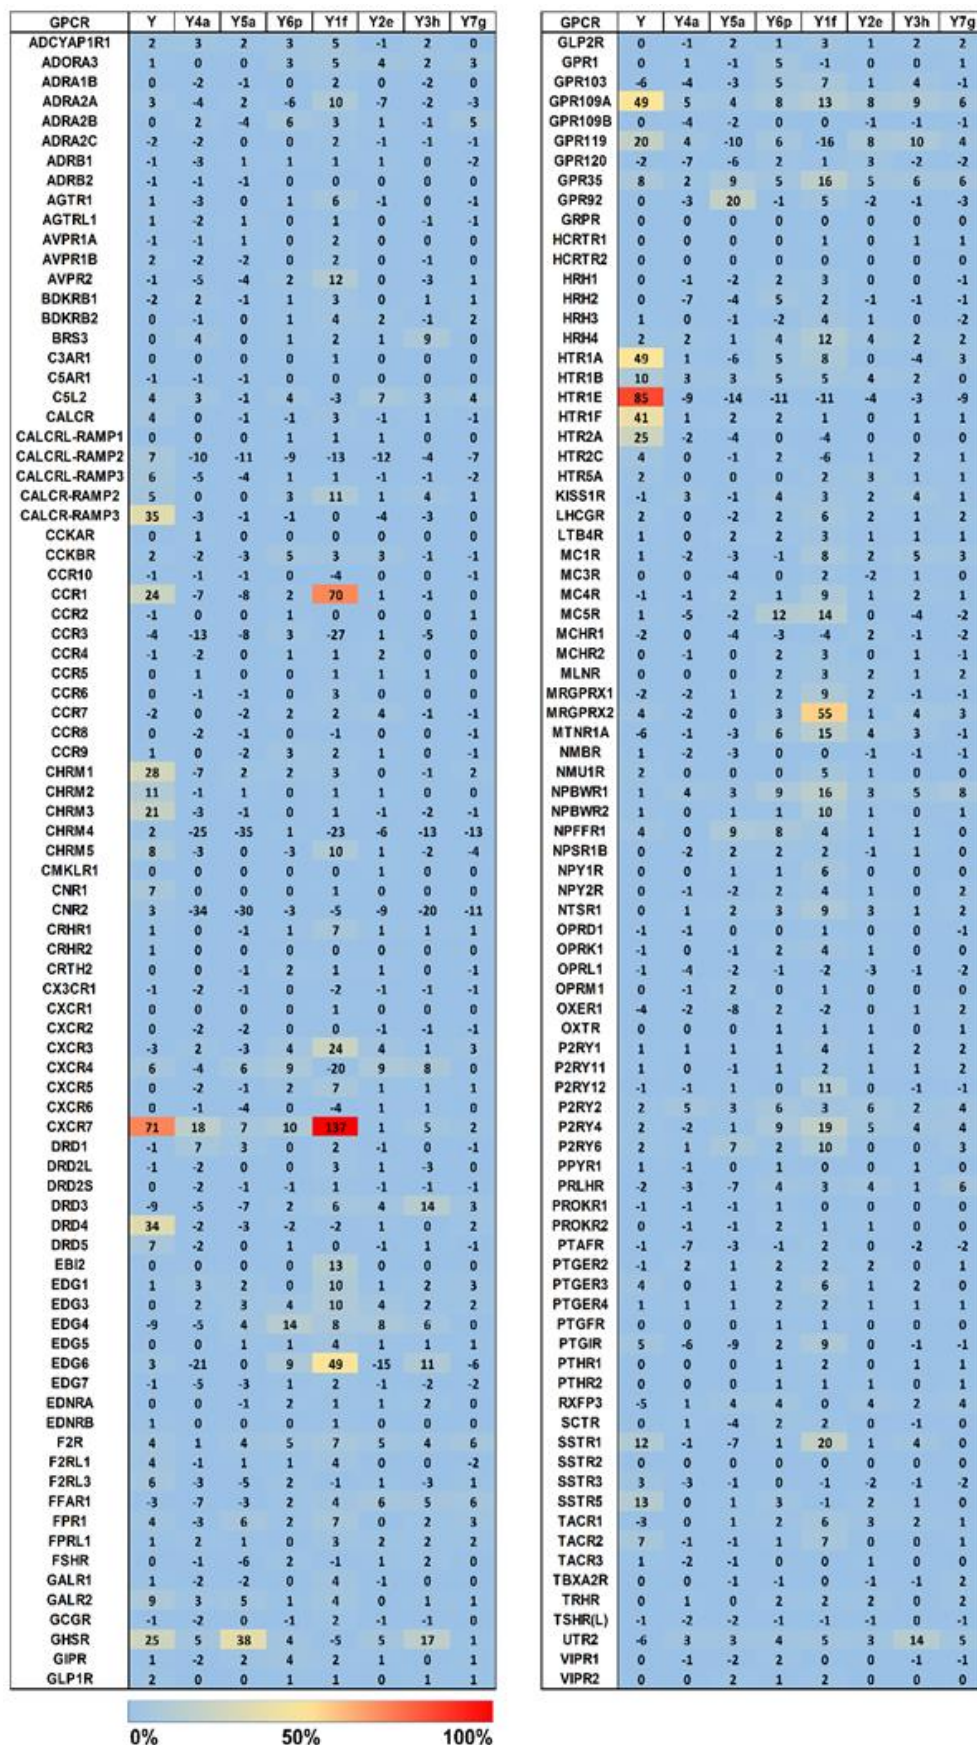

Rows correspond to GPCR drug targets. Columns correspond to percent activation of compounds screened in agonist mode at 20  $\mu$ M against each GPCR.

### III. Supplementary Figure 2. Antagonistic Activity Heatmap of Yohimbine Analogues against 168 GPCRs.

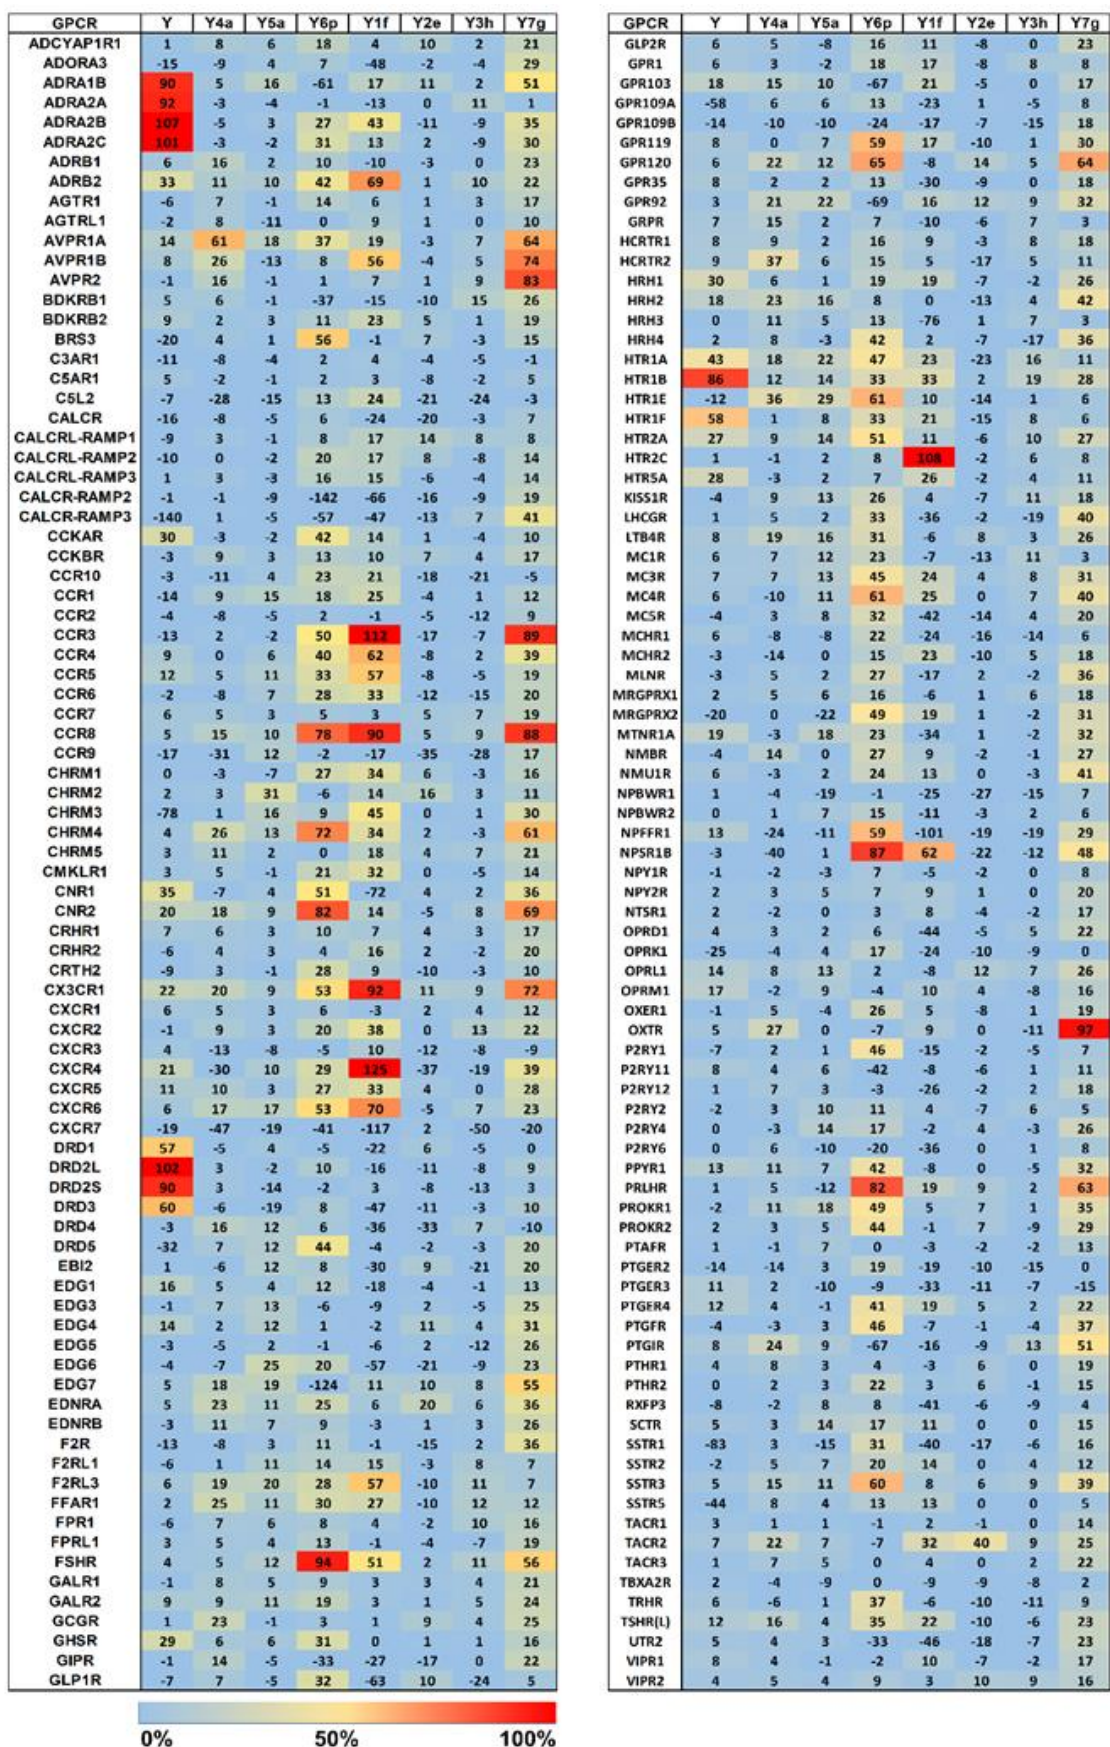

Rows correspond to GPCR drug targets. Columns correspond to percent inhibition of compounds screened in antagonist mode at 20  $\mu$ M against each GPCR.

IV. Supplementary Figure 3. Y7g (NP-8-25) Dose-Dependent Inhibition against Select GPCRs.

| Compound Name | Project ID               | Assay Name | Assay Format | Assay Target | Result Type | RC50 (uM) | Hill   | Curve Bottom | Curve Top | Max Response | Result Graph                                                                                         |
|---------------|--------------------------|------------|--------------|--------------|-------------|-----------|--------|--------------|-----------|--------------|------------------------------------------------------------------------------------------------------|
| NP-8-25       | UFLD10-01-d-00001-000-00 | Arrestin   | Antagonist   | AVPR2        | IC50        | 0.4593884 | 2.4376 | 10.336       | 100.27    | 101.04       | <p>NP-8-25<br/>AVPR2<br/>Max = 100.3 Slope = 2.438<br/>Min = 10.34 IC50 = 0.4594<br/>R2 = 0.9862</p> |
| NP-8-25       | UFLD10-01-d-00001-000-00 | Arrestin   | Antagonist   | CCR3         | IC50        | 5.481103  | 1.3171 | -3.3154      | 100       | 96.651       | <p>NP-8-25<br/>CCR3<br/>Max = 100 Slope = 1.317<br/>Min = -3.315 IC50 = 5.481<br/>R2 = 0.9674</p>    |
| NP-8-25       | UFLD10-01-d-00001-000-00 | Arrestin   | Antagonist   | CCR8         | IC50        | 6.036859  | 1.7916 | -8.2358      | 80        | 82.175       | <p>NP-8-25<br/>CCR8<br/>Max = 80 Slope = 1.792<br/>Min = -8.236 IC50 = 6.037<br/>R2 = 0.9542</p>     |
| NP-8-25       | UFLD10-01-d-00001-000-00 | Arrestin   | Antagonist   | OXTR         | IC50        | 1.164683  | 1.819  | -4.1245      | 100       | 96.486       | <p>NP-8-25<br/>OXTR<br/>Max = 100 Slope = 1.819<br/>Min = -4.125 IC50 = 1.165<br/>R2 = 0.9934</p>    |

Positive-control comparators evaluated alongside Y7g (NP-8-25).

| Compound Name | Project ID               | Assay Name | Assay Format | Assay Target | Result Type | RCS0 (uM)    | Hill    | Curve Bottom | Curve Top | Max Response | Result Graph                                                                                              |
|---------------|--------------------------|------------|--------------|--------------|-------------|--------------|---------|--------------|-----------|--------------|-----------------------------------------------------------------------------------------------------------|
| Vasopressin   | UFL010-01-d-00001-000-00 | Arrestin   | Agonist      | AVPR2        | EC50        | 9.556304E-05 | 2.3922  | 3.7904       | 100       | 85.911       | <p>Vasopressin<br/>AVPR2</p> <p>Max = 100 Slope = 2.392<br/>Min = 3.79 EC50 = 9.556e-5<br/>R2 = 0.92</p>  |
| Tolvaptan     | UFL010-01-d-00001-000-00 | Arrestin   | Antagonist   | AVPR2        | IC50        | 7.338717E-06 | 1.8815  | 0            | 104.12    | 105.76       | <p>Tolvaptan<br/>AVPR2</p> <p>Max = 104.1 Slope = 1.881<br/>Min = 0 IC50 = 7.339e-6<br/>R2 = 0.9898</p>   |
| CCL13         | UFL010-01-d-00001-000-00 | Arrestin   | Agonist      | CCR3         | EC50        | 0.03832658   | 1.2184  | 1.1819       | 100       | 100          | <p>CCL13<br/>CCR3</p> <p>Max = 100 Slope = 1.218<br/>Min = 1.182 EC50 = 0.03833<br/>R2 = 0.9921</p>       |
| CCL1          | UFL010-01-d-00001-000-00 | Arrestin   | Agonist      | CCR8         | EC50        | 0.09674311   | 0.99411 | -0.72743     | 100       | 91.176       | <p>CCL1<br/>CCR8</p> <p>Max = 100 Slope = 0.9941<br/>Min = -0.7274 EC50 = 0.09674<br/>R2 = 0.9923</p>     |
| Oxytocin      | UFL010-01-d-00001-000-00 | Arrestin   | Agonist      | OXTR         | EC50        | 0.006488585  | 0.97039 | 0.96685      | 100       | 100          | <p>Oxytocin<br/>OXTR</p> <p>Max = 100 Slope = 0.9704<br/>Min = 0.9668 EC50 = 0.006489<br/>R2 = 0.9865</p> |

Continued. Positive-control comparators evaluated alongside Y7g (NP-8-25).

| Compound Name | Project ID               | Assay Name | Assay Format | Assay Target | Result Type | RC50 (uM)   | Hill    | Curve Bottom | Curve Top | Max Response | Result Graph                                                                                           |
|---------------|--------------------------|------------|--------------|--------------|-------------|-------------|---------|--------------|-----------|--------------|--------------------------------------------------------------------------------------------------------|
| L-368,899     | UFL010-01-d-00001-000-00 | Arrestin   | Antagonist   | OXTR         | IC50        | 0.004615725 | 0.93537 | 0            | 99.978    | 100.14       | <p>L-368,899<br/>OXTR</p> <p>Max = 99.98 Slope = 0.9354<br/>Min = 0 IC50 = 0.004616<br/>R2 = 0.995</p> |

Summary of investigations with Y7g (NP-8-25).

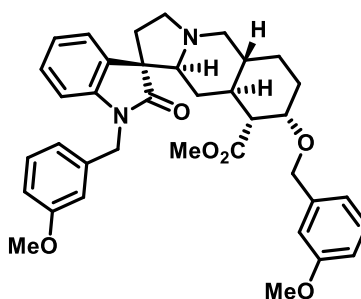

Y7g (NP-8-25)

| Compound Name | Project ID               | Assay Name | Assay Format | Assay Target | Result Type | RC50 (uM)    | Hill    | Curve Bottom | Curve Top | Max Response |
|---------------|--------------------------|------------|--------------|--------------|-------------|--------------|---------|--------------|-----------|--------------|
| Vasopressin   | UFL010-01-d-00001-000-00 | Arrestin   | Agonist      | AVPR2        | EC50        | 9.556304E-05 | 2.3922  | 3.7904       | 100       | 85.911       |
| Tolvaptan     | UFL010-01-d-00001-000-00 | Arrestin   | Antagonist   | AVPR2        | IC50        | 7.338717E-06 | 1.8815  | 0            | 104.12    | 105.76       |
| CCL13         | UFL010-01-d-00001-000-00 | Arrestin   | Agonist      | CCR3         | EC50        | 0.03832658   | 1.2184  | 1.1819       | 100       | 100          |
| CCL1          | UFL010-01-d-00001-000-00 | Arrestin   | Agonist      | CCR8         | EC50        | 0.09674311   | 0.99411 | -0.72743     | 100       | 91.176       |
| Oxytocin      | UFL010-01-d-00001-000-00 | Arrestin   | Agonist      | OXTR         | EC50        | 0.006488585  | 0.97039 | 0.96685      | 100       | 100          |
| L-368,899     | UFL010-01-d-00001-000-00 | Arrestin   | Antagonist   | OXTR         | IC50        | 0.004615725  | 0.93537 | 0            | 99.978    | 100.14       |
| NP-8-25       | UFL010-01-d-00001-000-00 | Arrestin   | Antagonist   | AVPR2        | IC50        | 0.4593884    | 2.4376  | 10.336       | 100.27    | 101.04       |
| NP-8-25       | UFL010-01-d-00001-000-00 | Arrestin   | Antagonist   | CCR3         | IC50        | 5.481103     | 1.3171  | -3.3154      | 100       | 96.651       |
| NP-8-25       | UFL010-01-d-00001-000-00 | Arrestin   | Antagonist   | CCR8         | IC50        | 6.036859     | 1.7916  | -8.2358      | 80        | 82.175       |
| NP-8-25       | UFL010-01-d-00001-000-00 | Arrestin   | Antagonist   | OXTR         | IC50        | 1.164683     | 1.819   | -4.1245      | 100       | 96.486       |

V. Supplementary Figure 4. Y1f (NP-7-53) Dose-Dependent Inhibition against Select GPCRs.

| Compound Name | Project ID               | Assay Name | Assay Format | Assay Target | Result Type | RC50 (uM) | Hill   | Curve Bottom | Curve Top | Max Response | Result Graph                                                                                           |
|---------------|--------------------------|------------|--------------|--------------|-------------|-----------|--------|--------------|-----------|--------------|--------------------------------------------------------------------------------------------------------|
| NP-7-53       | UFL008-01-d-00001-000-00 | Arrestin   | Antagonist   | CCR3         | IC50        | 8.290315  | 4.3604 | -2.3235      | 102.68    | 102.35       | <p>NP-7-53<br/>CCR3<br/>Max = 102.7 Slope = 4.36<br/>Min = -2.324 IC50 = 8.29<br/>R2 = 0.975</p>       |
| NP-7-53       | UFL008-01-d-00001-000-00 | Arrestin   | Antagonist   | CCR8         | IC50        | 7.291603  | 2.5391 | 3.1561       | 87.175    | 85.051       | <p>NP-7-53<br/>CCR8<br/>Max = 87.18 Slope = 2.539<br/>Min = 3.156 IC50 = 7.292<br/>R2 = 0.9694</p>     |
| NP-7-53       | UFL008-01-d-00001-000-00 | Arrestin   | Antagonist   | CX3CR1       | IC50        | 8.468666  | 2.3088 | -0.26463     | 103.73    | 102.15       | <p>NP-7-53<br/>CX3CR1<br/>Max = 103.7 Slope = 2.309<br/>Min = -0.2646 IC50 = 8.469<br/>R2 = 0.9878</p> |
| NP-7-53       | UFL008-01-d-00001-000-00 | Arrestin   | Antagonist   | CXCR4        | IC50        | 7.936554  | 3.5291 | 10.203       | 105       | 100.4        | <p>NP-7-53<br/>CXCR4<br/>Max = 105 Slope = 3.529<br/>Min = 10.2 IC50 = 7.937<br/>R2 = 0.8533</p>       |
| NP-7-53       | UFL008-01-d-00001-000-00 | Arrestin   | Antagonist   | HTR2C        | IC50        | 0.1756965 | 1.1212 | 0            | 106.22    | 110.1        | <p>NP-7-53<br/>HTR2C<br/>Max = 106.2 Slope = 1.121<br/>Min = 0 IC50 = 0.1757<br/>R2 = 0.9791</p>       |



Positive-control comparators evaluated alongside Y1f (NP-7-53).

| Compound Name    | Project ID               | Assay Name | Assay Format | Assay Target | Result Type | EC50 (uM)   | Hill    | Curve Bottom | Curve Top | Max Response | Result Graph |
|------------------|--------------------------|------------|--------------|--------------|-------------|-------------|---------|--------------|-----------|--------------|--------------|
| CCL13            | UFL008-01-d-00001-000-00 | Arrestin   | Agonist      | CCR3         | EC50        | 0.03832658  | 1.2184  | 1.1819       | 100       | 100          |              |
| CCL1             | UFL008-01-d-00001-000-00 | Arrestin   | Agonist      | CCR8         | EC50        | 0.09674311  | 0.99411 | -0.72743     | 100       | 91.176       |              |
| Fractalkine      | UFL008-01-d-00001-000-00 | Arrestin   | Agonist      | CX3CR1       | EC50        | 0.002201558 | 1.0354  | -1.0393      | 99.659    | 100          |              |
| CXCL12           | UFL008-01-d-00001-000-00 | Arrestin   | Agonist      | CXCR4        | EC50        | 0.002401872 | 0.73368 | -4.3946      | 100       | 102.31       |              |
| Serotonin / 5-HT | UFL008-01-d-00001-000-00 | Arrestin   | Agonist      | HTR2C        | EC50        | 0.002948356 | 0.99676 | 5.1362       | 100       | 105.56       |              |

Summary of investigations with Y1f (NP-7-53).

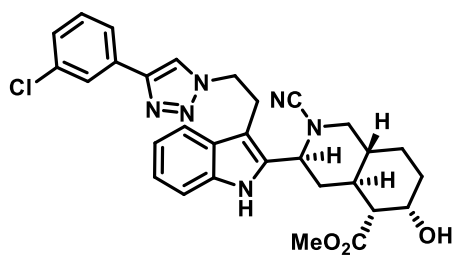

Y1f (NP-7-53)

| Compound Name    | Project ID               | Assay Name | Assay Format | Assay Target | Result Type | RC50 (uM)   | Hill    | Curve Bottom | Curve Top | Max Response |
|------------------|--------------------------|------------|--------------|--------------|-------------|-------------|---------|--------------|-----------|--------------|
| CCL13            | UFL008-01-d-00001-000-00 | Arrestin   | Agonist      | CCR3         | EC50        | 0.03832658  | 1.2184  | 1.1819       | 100       | 100          |
| CCL1             | UFL008-01-d-00001-000-00 | Arrestin   | Agonist      | CCR8         | EC50        | 0.09674311  | 0.99411 | -0.72743     | 100       | 91.176       |
| Fractalkine      | UFL008-01-d-00001-000-00 | Arrestin   | Agonist      | CX3CR1       | EC50        | 0.002201558 | 1.0354  | -1.0393      | 99.659    | 100          |
| CXCL12           | UFL008-01-d-00001-000-00 | Arrestin   | Agonist      | CXCR4        | EC50        | 0.002401872 | 0.73368 | -4.3946      | 100       | 102.31       |
| Serotonin / 5-HT | UFL008-01-d-00001-000-00 | Arrestin   | Agonist      | HTR2C        | EC50        | 0.002948356 | 0.99676 | 5.1362       | 100       | 105.56       |
| NP-7-53          | UFL008-01-d-00001-000-00 | Arrestin   | Antagonist   | CCR3         | IC50        | 8.290315    | 4.3604  | -2.3235      | 102.68    | 102.35       |
| NP-7-53          | UFL008-01-d-00001-000-00 | Arrestin   | Antagonist   | CCR8         | IC50        | 7.291603    | 2.5391  | 3.1561       | 87.175    | 85.051       |
| NP-7-53          | UFL008-01-d-00001-000-00 | Arrestin   | Antagonist   | CX3CR1       | IC50        | 8.468666    | 2.3088  | -0.26463     | 103.73    | 102.15       |
| NP-7-53          | UFL008-01-d-00001-000-00 | Arrestin   | Antagonist   | CXCR4        | IC50        | 7.936554    | 3.5291  | 10.203       | 105       | 100.4        |
| NP-7-53          | UFL008-01-d-00001-000-00 | Arrestin   | Antagonist   | HTR2C        | IC50        | 0.1756965   | 1.1212  | 0            | 106.22    | 110.1        |

## VI. Supplementary Figure 5. Y6p (NP-7-115) Dose-Dependent Inhibition against Select GPCRs.

| Compound Name | Project ID               | Assay Name | Assay Format | Assay Target | Result Type | RC50 (uM) | Hill   | Curve Bottom | Curve Top | Max Response | Result Graph                                                                                            |
|---------------|--------------------------|------------|--------------|--------------|-------------|-----------|--------|--------------|-----------|--------------|---------------------------------------------------------------------------------------------------------|
| NP-7-115      | UFL009-01-d-00001-000-00 | Arrestin   | Antagonist   | FSHR         | IC50        | 8.03491   | 2.2975 | -3.1607      | 99.537    | 98.194       | <p>NP-7-115<br/>FSHR</p> <p>Max = 99.54 Slope = 2.297<br/>Min = -3.161 IC50 = 8.035<br/>R2 = 0.9484</p> |
| NP-7-115      | UFL009-01-d-00001-000-00 | Arrestin   | Antagonist   | NPSR1B       | IC50        | 10.31193  | 2.9899 | 4.9977       | 100       | 98.409       | <p>NP-7-115<br/>NPSR1B</p> <p>Max = 100 Slope = 2.99<br/>Min = 4.998 IC50 = 10.31<br/>R2 = 0.9784</p>   |
| NP-7-115      | UFL009-01-d-00001-000-00 | Arrestin   | Antagonist   | PRLHR        | IC50        | 4.892051  | 3.0216 | 7.135        | 100       | 100.2        | <p>NP-7-115<br/>PRLHR</p> <p>Max = 100 Slope = 3.022<br/>Min = 7.135 IC50 = 4.892<br/>R2 = 0.9622</p>   |

Positive-control comparators evaluated alongside Y6p (NP-7-115).

| Compound Name  | Project ID               | Assay Name | Assay Format | Assay Target | Result Type | RC50 (uM)   | Hill   | Curve Bottom | Curve Top | Max Response | Result Graph                                                                                                 |
|----------------|--------------------------|------------|--------------|--------------|-------------|-------------|--------|--------------|-----------|--------------|--------------------------------------------------------------------------------------------------------------|
| FSH            | UFL009-01-d-00001-000-00 | Arrestin   | Agonist      | FSHR         | EC50        | 0.002949678 | 1.5455 | 8.2508       | 100       | 111.49       | <p>FSH<br/>FSHR</p> <p>Max = 100 Slope = 1.545<br/>Min = 8.251 EC50 = 0.00295<br/>R2 = 0.9773</p>            |
| Neuropeptide S | UFL009-01-d-00001-000-00 | Arrestin   | Agonist      | NPSR1B       | EC50        | 0.01396175  | 1.1544 | 0            | 97.292    | 103.44       | <p>Neuropeptide S<br/>NPSR1B</p> <p>Max = 97.29 Slope = 1.154<br/>Min = 0 EC50 = 0.01396<br/>R2 = 0.9767</p> |
| SHA 68         | UFL009-01-d-00001-000-00 | Arrestin   | Antagonist   | NPSR1B       | IC50        | 0.08218263  | 1.9069 | 0            | 109.26    | 112.12       | <p>SHA 68<br/>NPSR1B</p> <p>Max = 109.3 Slope = 1.907<br/>Min = 0 IC50 = 0.08218<br/>R2 = 0.9926</p>         |
| PrRP-31        | UFL009-01-d-00001-000-00 | Arrestin   | Agonist      | PRLHR        | EC50        | 0.001670129 | 1.2469 | -2.7102      | 100       | 101.88       | <p>PrRP-31<br/>PRLHR</p> <p>Max = 100 Slope = 1.247<br/>Min = -2.71 EC50 = 0.00167<br/>R2 = 0.9948</p>       |

Summary of investigations with **Y6p (NP-7-115)**.

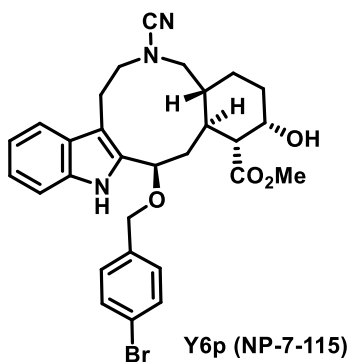

| Compound Name  | Project ID               | Assay Name | Assay Format | Assay Target | Result Type | RC50 (uM)   | Hill   | Curve Bottom | Curve Top | Max Response |
|----------------|--------------------------|------------|--------------|--------------|-------------|-------------|--------|--------------|-----------|--------------|
| FSH            | UFL009-01-d-00001-000-00 | Arrestin   | Agonist      | FSHR         | EC50        | 0.002949578 | 1.5455 | 8.2508       | 100       | 111.49       |
| Neuropeptide S | UFL009-01-d-00001-000-00 | Arrestin   | Agonist      | NPSR1B       | EC50        | 0.01396175  | 1.1544 | 0            | 97.292    | 103.44       |
| SHA 68         | UFL009-01-d-00001-000-00 | Arrestin   | Antagonist   | NPSR1B       | IC50        | 0.08218263  | 1.9069 | 0            | 109.26    | 112.12       |
| PrRP-31        | UFL009-01-d-00001-000-00 | Arrestin   | Agonist      | PRLHR        | EC50        | 0.001670129 | 1.2469 | -2.7102      | 100       | 101.88       |
| NP-7-115       | UFL009-01-d-00001-000-00 | Arrestin   | Antagonist   | FSHR         | IC50        | 8.03491     | 2.2975 | -3.1607      | 99.537    | 98.194       |
| NP-7-115       | UFL009-01-d-00001-000-00 | Arrestin   | Antagonist   | NPSR1B       | IC50        | 10.31193    | 2.9899 | 4.9977       | 100       | 98.409       |
| NP-7-115       | UFL009-01-d-00001-000-00 | Arrestin   | Antagonist   | PRLHR        | IC50        | 4.892051    | 3.0216 | 7.135        | 100       | 100.2        |
